# Supplementary material for: Small molecule inhibition of human cGAS reduces total cGAMP output and cytokine expression in cells
Source: PubMed Central journal article supplement (PMC7200739; doi:10.1038/s41598-020-64348-y), 2020-05-05
Supplement: 41598_2020_64348_MOESM2_ESM.pdf [file 41598_2020_64348_MOESM2_ESM.pdf]

## **SUPPLEMENTARY INFORMATION**

### **ARTICLE TITLE**

**Small molecule inhibition of human cGAS reduces total cGAMP output and cytokine expression in cells**

### **AUTHORS**

Caroline Wisner<sup>1</sup>, Byungil Kim<sup>1</sup>, Jessica Vincent<sup>1</sup>, and Manuel Ascano<sup>1\*</sup>

<sup>1</sup>Vanderbilt University School of Medicine, Nashville, TN 37027, USA

\*Corresponding author: [manuel.ascano@vanderbilt.edu](mailto:manuel.ascano@vanderbilt.edu)

Supplementary Figure 1:

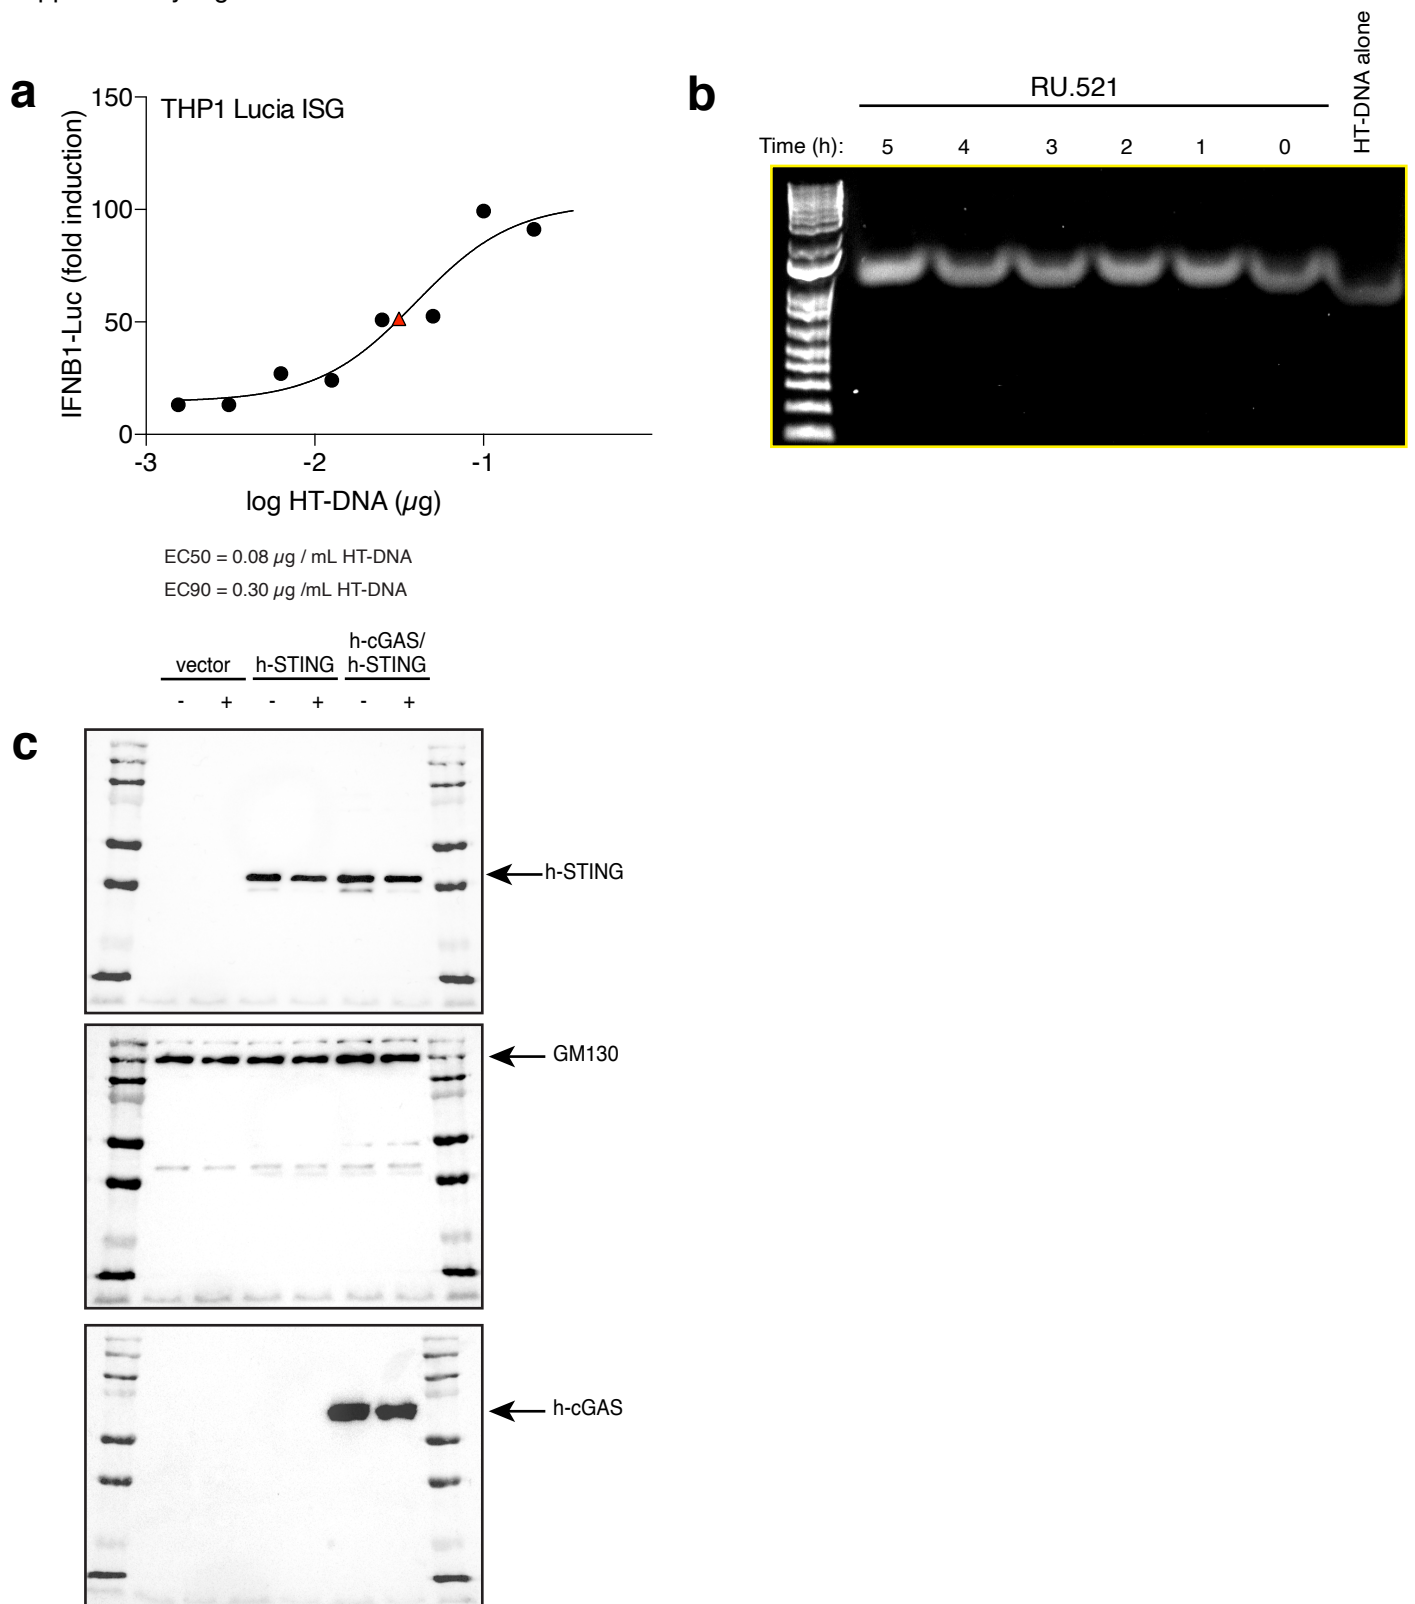

**Supplementary Fig. 1:** HT-DNA dose-response curve to determine appropriate concentration of HT-DNA for cGAS-mediated immune activation of THP-1 cells. EC90 was determined to be 0.3  $\mu\text{g}$  HT-DNA/ mL of media (a). RU.521 does not degrade dsDNA. Using the established EC90 of 0.3  $\mu\text{g}$  HT-DNA/ mL and an IC50 of 0.8  $\mu\text{M}$  RU.521, both reagents were added to 1x PBS and incubated from 0-5 hours and then run on a 1.0% agarose gel (b). Full blot images from Figure 1 (c).

Supplementary Figure 2:

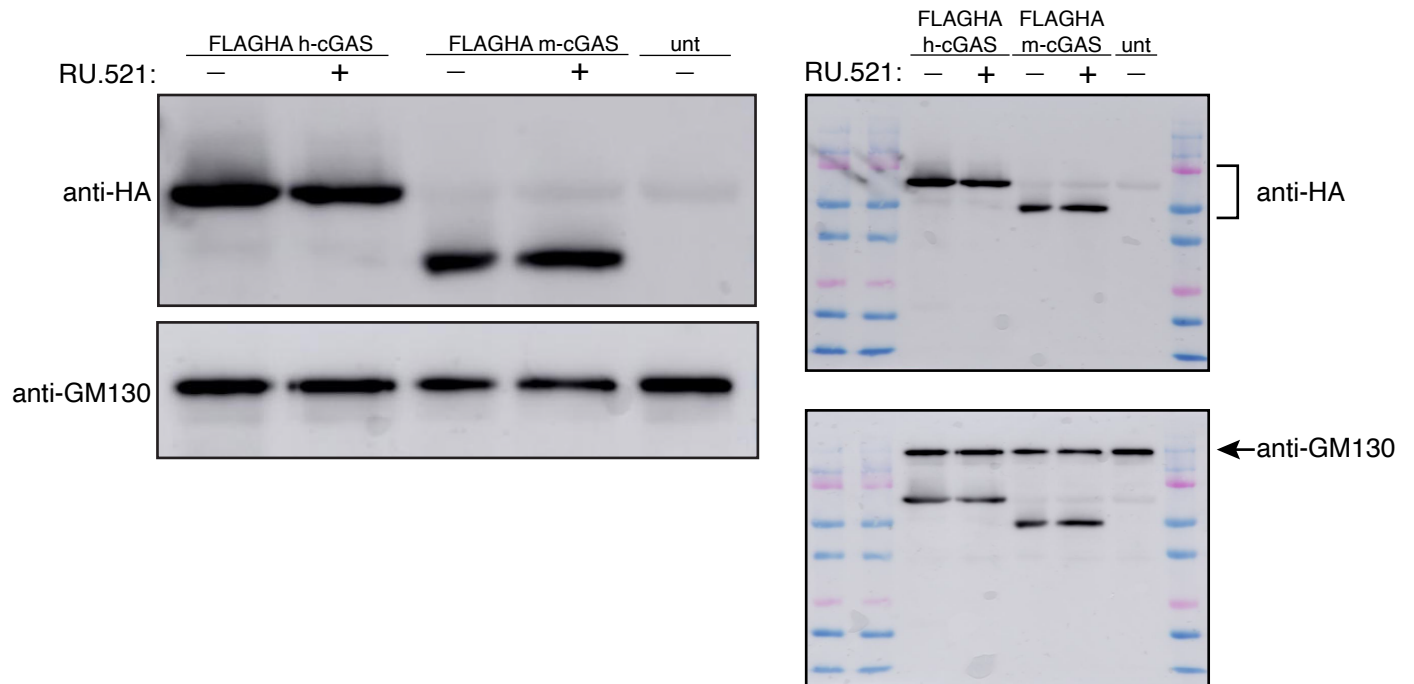

**Supplementary Fig. 2:** Western Blot of HEK293 cellular lysate transiently transfected with either human or mouse cGAS (with N-terminal Flag and HA tags). The presence of RU.521 does not alter protein levels of m-cGAS or h-cGAS. GM130 served as the loading control. 10  $\mu$ g of total protein was loaded into each well.

Supplementary Figure 3:

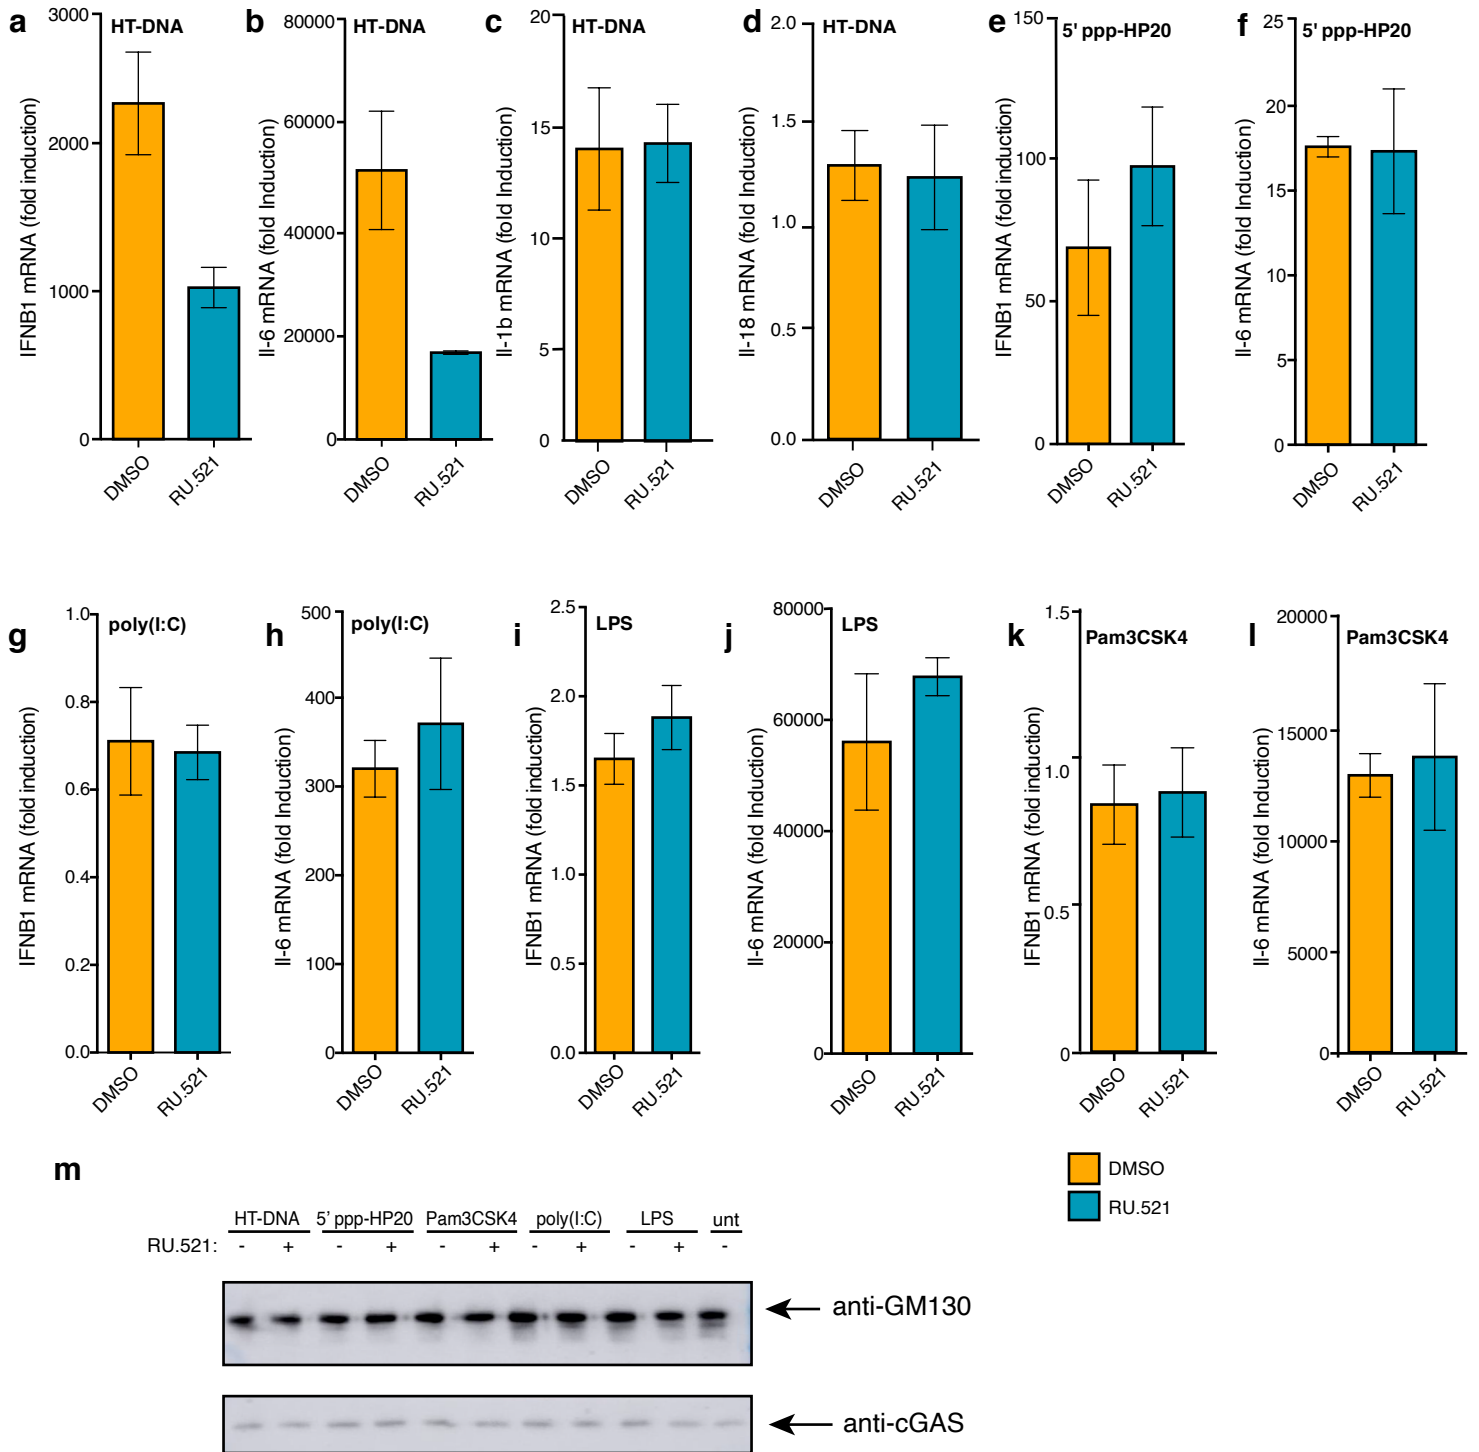

**Supplementary Fig. 3:** Actual gene expression values shown in Figure 2 (a-l). Immunoblot verification to ensure protein levels across samples remain consistent in the presence of RU.521 (m).

Supplementary Figure 4:

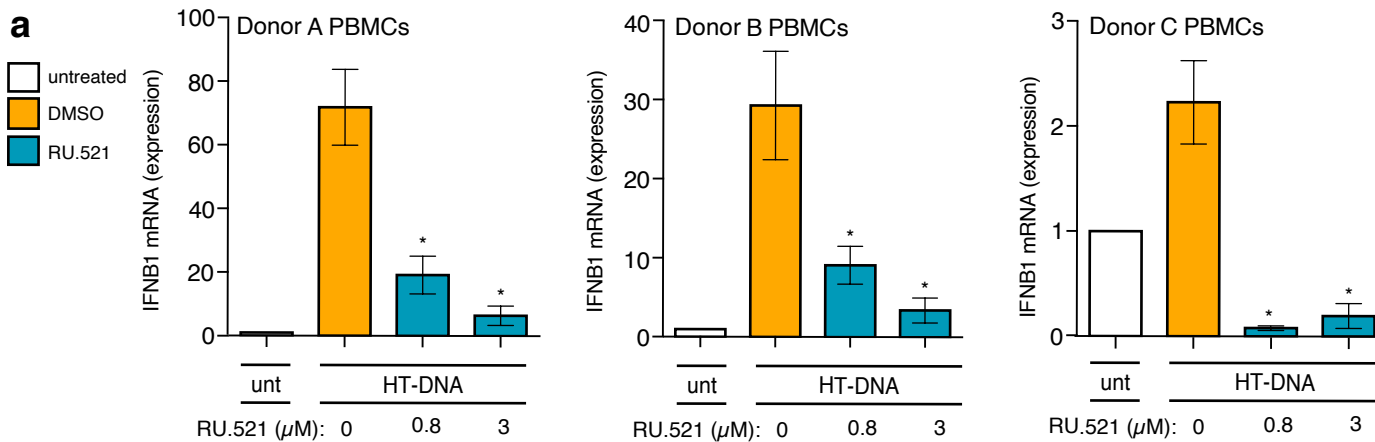

**Supplementary Fig. 4:** Actual IFNB1 mRNA expression values for each respective Donor (A,B, & C) shown in Figure 5.
